# Supplementary material
Source: Springer Nature journal article supplement (https://www.springermedizin.de/resource/supplementary/12885_2010_2740_MOESM3_ESM.PDF/9461856)
Supplement: MOESM3 [file 9461856]

**Additional File 3.** Copy number and LOH likelihood values for selected deleted regions in primary cultures and corresponding tissues, as calculated by CNAG v3.0 software.

| Sample       | Chr | Start Position | End Position | Mean CN LogRatio in culture | Mean CN LogRatio in tissue | Mean LOH likelihood in culture | Mean LOH likelihood in tissue | CNAG detection                                                   |
|--------------|-----|----------------|--------------|-----------------------------|----------------------------|--------------------------------|-------------------------------|------------------------------------------------------------------|
| <i>61FG</i>  | 3p  | 48603          | 87102814     | -0.44                       | -0.30                      | 6.9                            | 4.5                           | CN loss signed in culture and tissue, without LOH                |
|              | 11q | 106916419      | 134173875    | -0.43                       | -0.33                      | 4.9                            | 3.4                           | CN loss signed in culture and tissue, without LOH                |
| <i>66SML</i> | 2q  | 218401435      | 242142395    | -0.48                       | -0.22                      | 23                             | 2.2                           | CN loss (without LOH) signed in culture but not in tissue        |
|              | 3p  | 48603          | 105515576    | -0.50                       | -0.24                      | 259                            | 2.9                           | CN loss+LOH signed in culture but not in tissue                  |
|              | 9   | 305185         | 137012035    | -0.50                       | -0.25                      | 287                            | 3.1                           | CN loss+LOH signed in culture but not in tissue                  |
|              | 14q | 19387587       | 106241517    | -0.50                       | -0.24                      | 401                            | 4.1                           | CN loss+LOH signed in culture but not in tissue                  |
| <i>70LS</i>  | 3p  | 48603          | 89898956     | -0.50                       | -0.38                      | 33.4                           | 5.1                           | CN loss signed in culture and tissue, LOH signed only in culture |

Starting from the Hidden Markov Model (HMM) copy number log2ratios exported for each SNP by CNAG v3.0 software, we calculated the mean CN log ratio value for each region (start and end positions are reported), both in primary cultures and parental tumor tissues. Also, mean LOH likelihood values were calculated for primary cultures and corresponding tissues. In the “CNAG detection” column, we define “CN loss signed” those deletions reaching software threshold to be visualized in the color-coded HMM-CN state track; similarly, “LOH signed” are those events considered as statistically significant by CNAG (with LOH likelihood higher than 30) and thus visualized in the color-coded HMM-LOH track. Abbreviations: chr, chromosome; p, short arm; q, long arm; CN, copy number; LOH, loss of heterozygosity.
